# Supplementary material for: Quiet New Particle Formation is a significant aerosol source in the Amazon boundary layer
Source: Copernicus journal article supplement (doi:10.5194/egusphere-2025-4581), 2025-09-26
Supplement: Supplementary file 1 [file egusphere-2025-4581-supplement.pdf]

# Quiet New Particle Formation is a significant aerosol source in the Amazon boundary layer

Meller et al.

Correspondence to: Paulo Artaxo (artaxo@if.usp.br)

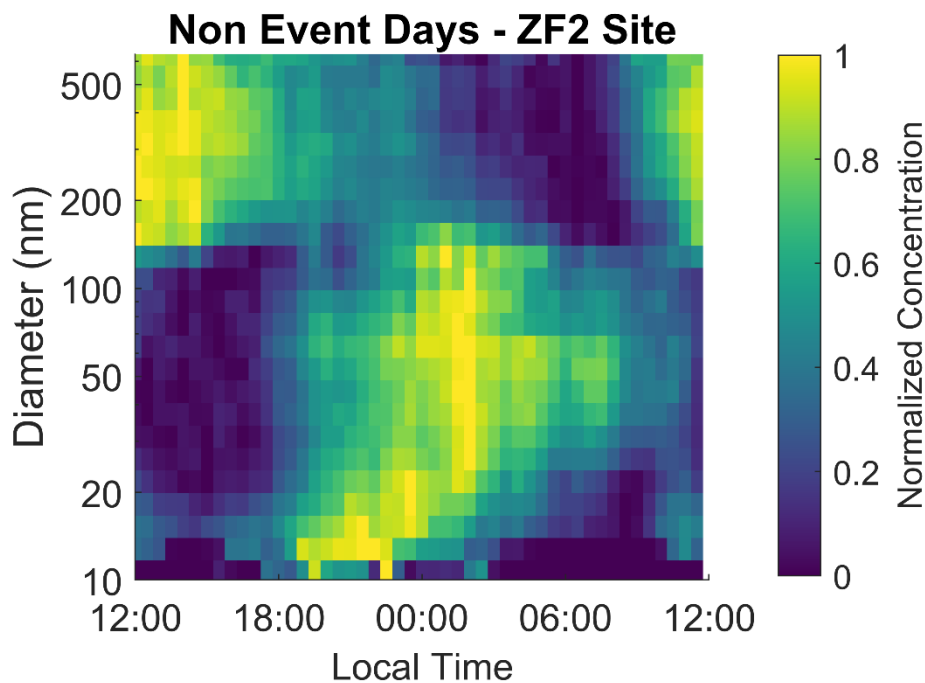

Figure S1. Median diurnal cycle of the normalized particle number size distribution (PNSD) during non-event days at the ZF2 site, Central Amazon, for wet seasons from 2008 to 2012. The observed sequential growth pattern of sub-50 nm particles closely resembles that seen at the ATTO site, supporting the conclusion that Quiet New Particle Formation is a regionally consistent process across the Central Amazon.

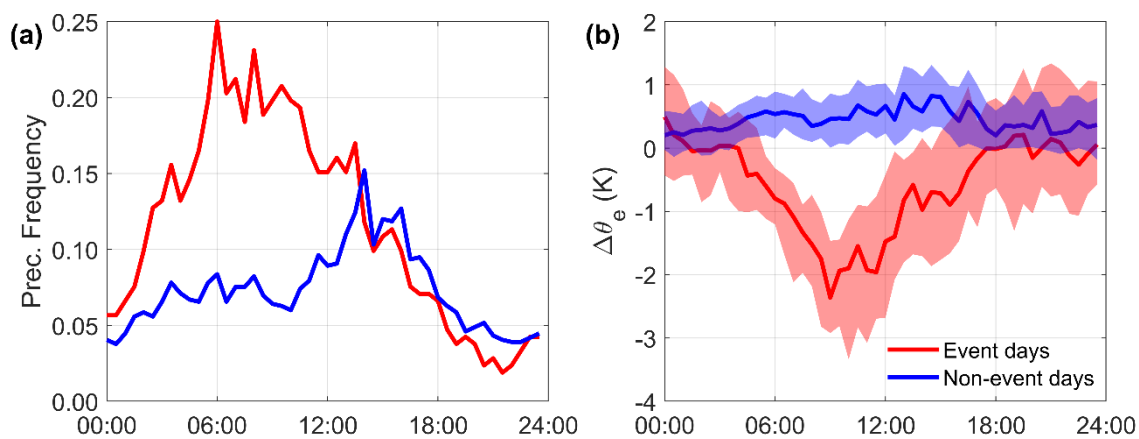

**Figure S2. Median diurnal cycle of the normalized particle number size distribution (PNSD) during non-event days at the ZF2 site, Central Amazon, for wet seasons from 2008 to 2012. The observed sequential growth pattern of sub-50 nm particles closely resembles that seen at the ATTO site, supporting the conclusion that Quiet New Particle Formation is a regionally consistent process across the Central Amazon.**
